# Supplementary material for: Paleoseismological evidence of multiple, large-magnitude earthquake surface ruptures on the active Mt. Morrone normal fault, central Apennines, Italy
Source: Copernicus journal article supplement (doi:10.5194/se-16-275-2025), 2025-05-13
Supplement: Supplementary file 1 [file se-16-275-2025-supplement.pdf]

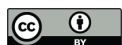

## *Supplement of*

# **Paleoseismological evidence of multiple, large-magnitude earthquake surface ruptures on the active Mt. Morrone normal fault, central Apennines, Italy**

**Irene Puliti et al.**

*Correspondence to:* Irene Puliti ([irene.puliti@unich.it](mailto:irene.puliti@unich.it))

The copyright of individual parts of the supplement might differ from the article licence.

## Supplements

In this supplement, additional pictures of the trenches' walls are shown (Figure S1-S8).

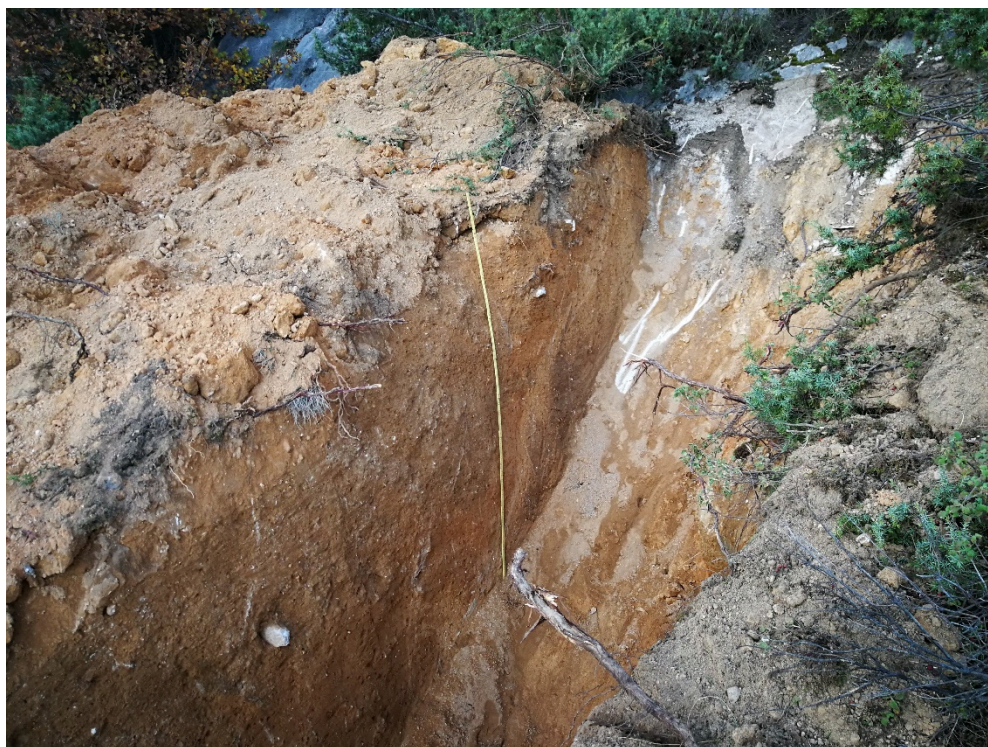

*Figure S1. Northern wall of trench TA. Detail of the bedrock fault plane.*

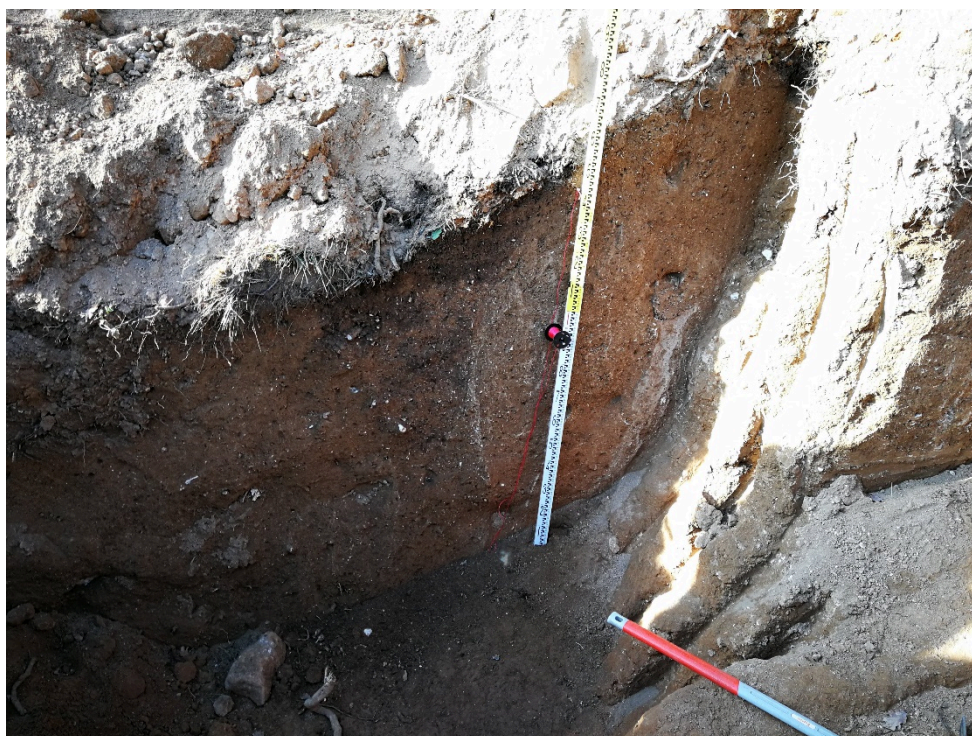

*Figure S2. Northern wall of trench TA. Detail of the FA fault zone.*



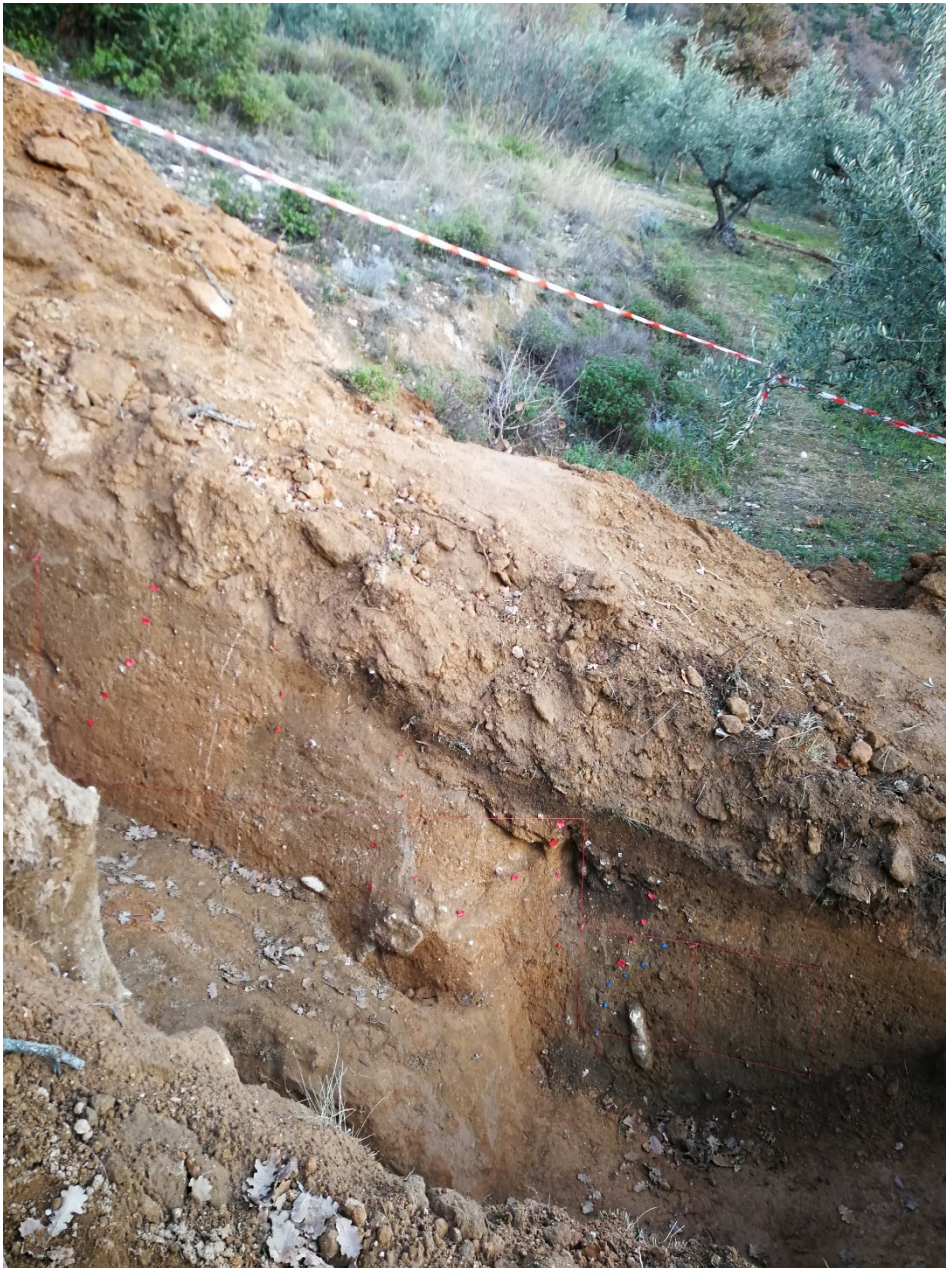

Figure S3. Southern wall of trench TA. Detail of the FA fault zone and of the morphological fault scarp.



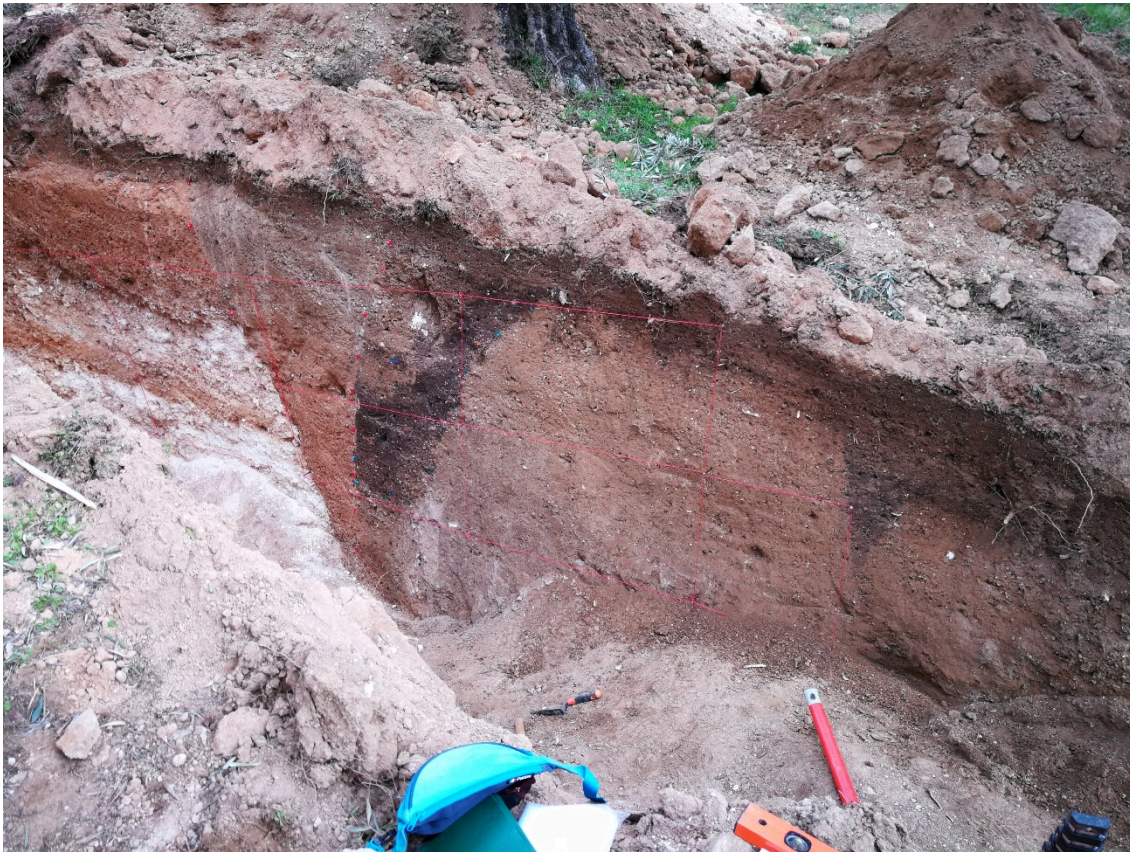

Figure S4. Southern wall of the trench TB. Detail of the FA and FB fault zones.

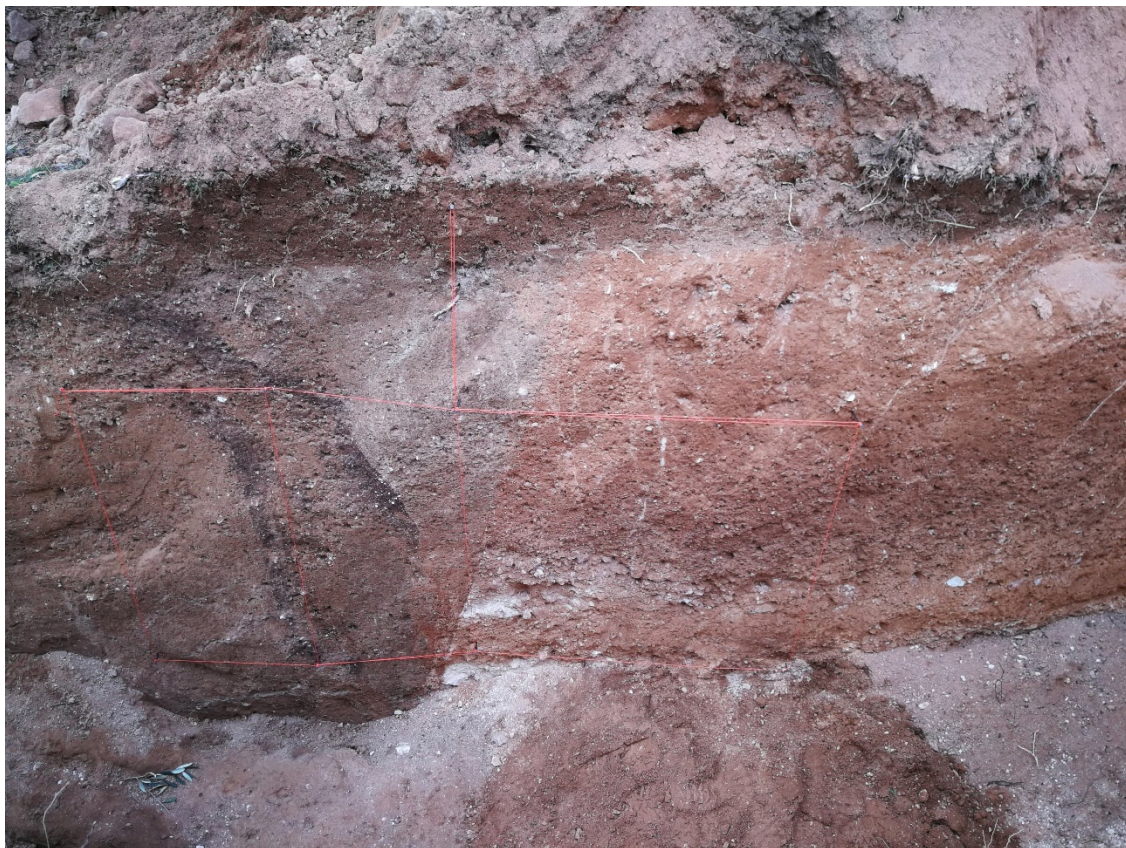

Figure S5. Northern wall of the trench TB. Detail of the FA fault zone.



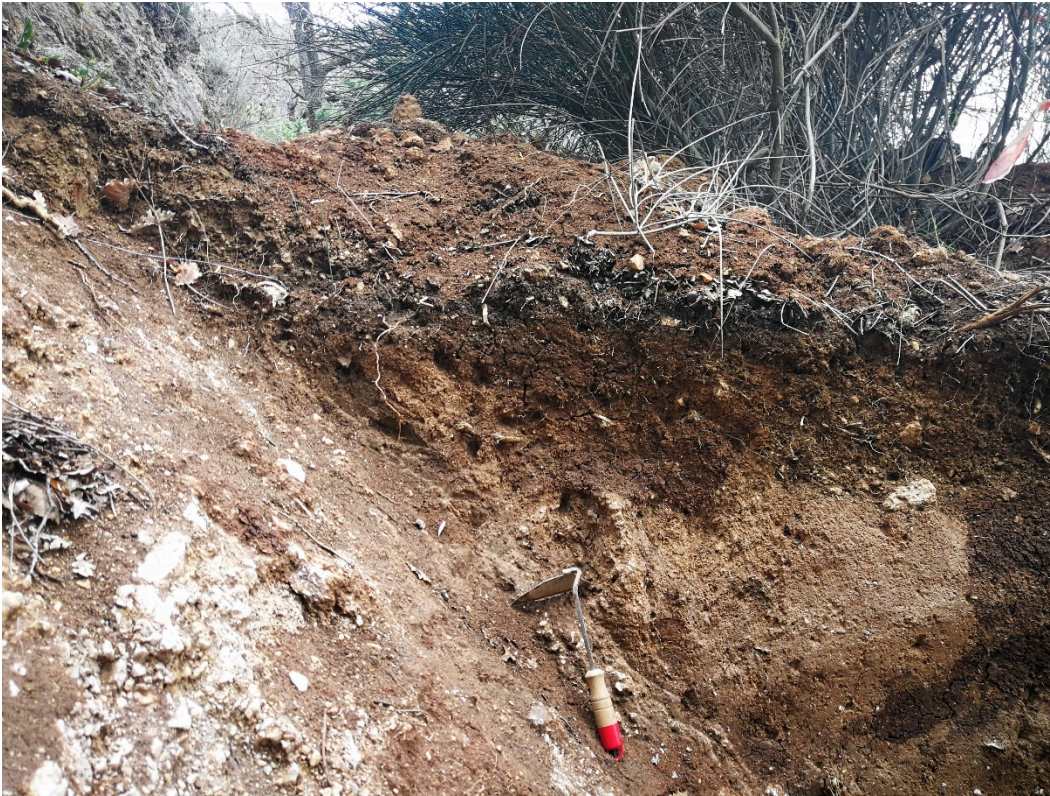

Figure S6. Southern wall of the trench TC. Detail of the bedrock fault plane.

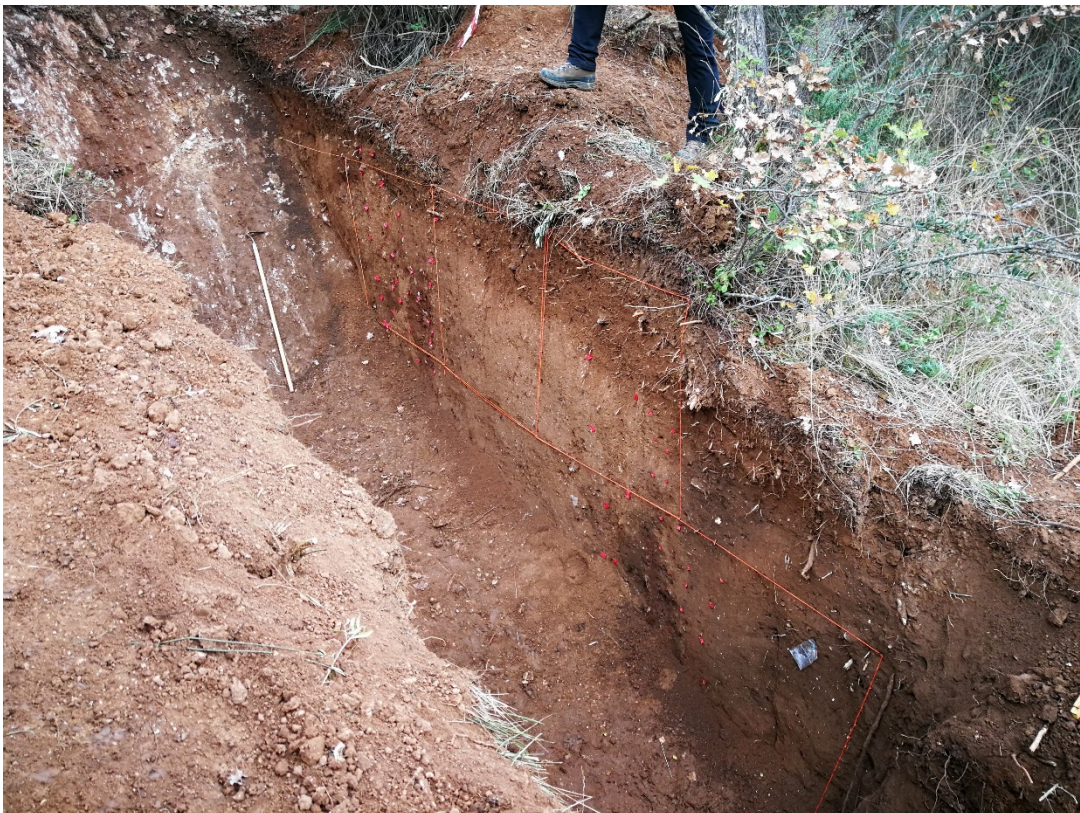

Figure S7. Southern wall of the trench TC.



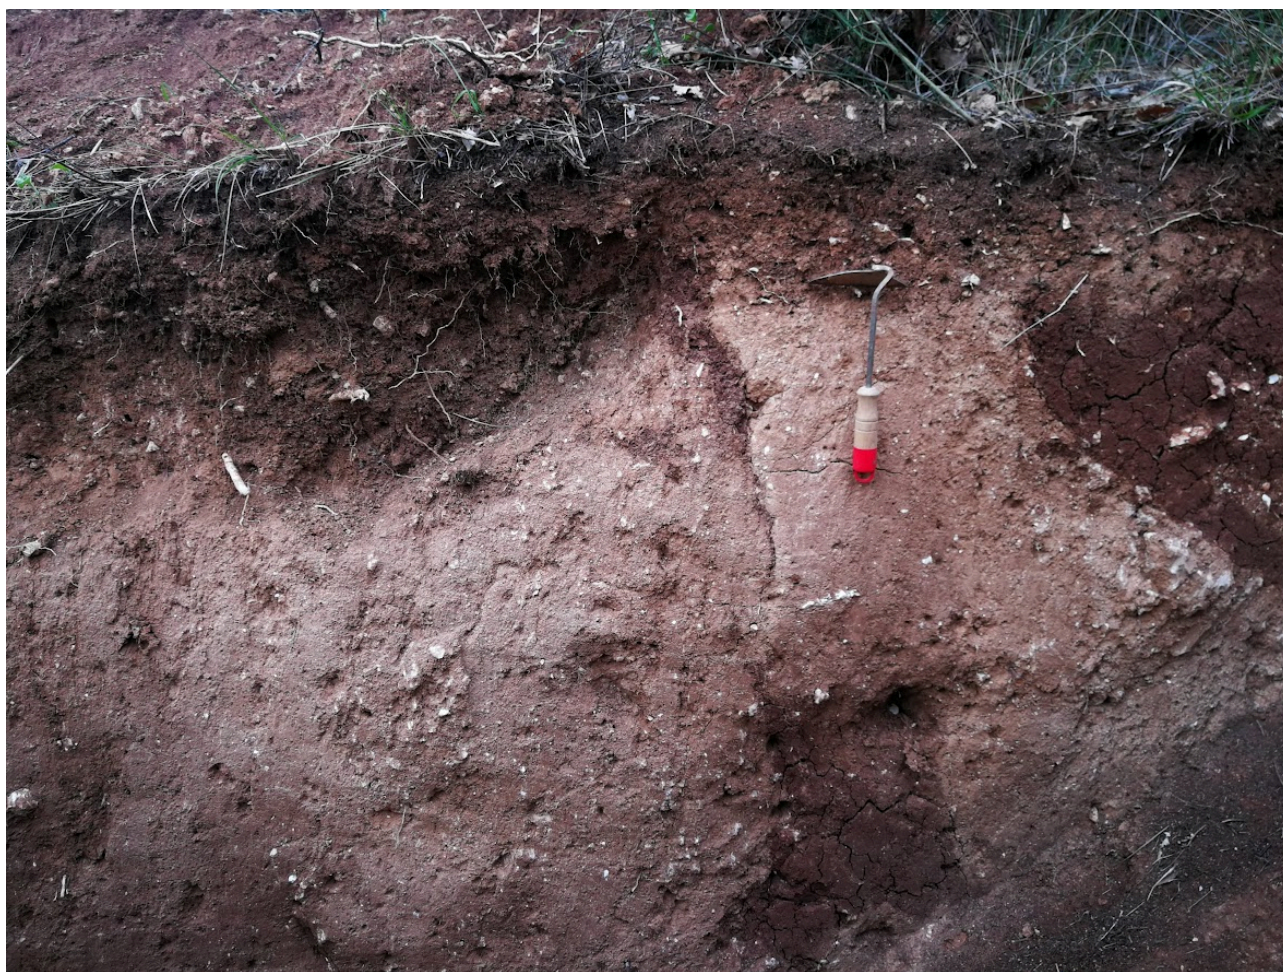

Figure S8. Northern wall of the trench TC.
